# Supplementary material
Source: publisher site journal article supplement (https://www.dovepress.com/article/424565)
Supplement: Supplementary file 1 [file get_supplementary_file.php]

**Supplementary materials**





Figure S1. The stability of strength and bridge strength using case-dropping bootstrap.

The x-axis indicates the percentage of cases of the original sample included at each step. The y-axis indicates the average of correlations between the centrality indices from the original network and the centrality indices from the networks that were re-estimated after excluding increasing percentages of cases.





Figure S2. Bootstrapped stability test for node strength

The color of the boxes indicates whether there is a significant difference between symptoms (i.e., grey boxes reflect no significant differences and black boxes reflect significant differences). The number in the white boxes (i.e., the diagonal line) denotes the value of node strength of a specific node.





Figure S3. Bootstrapped stability test for edge-weight

The color of the boxes indicates whether edge-weights differ significantly from each other (i.e., black) or do not differ significantly (i.e., grey). The diagonal line indicates the strength of edge-weights, shifting from red (negative associations), to white (representing weaker edges) and ultimately blue (representing stronger edge-weights).





Figure S4. Bootstrapped confidence intervals of all edges

The red dots indicate the values of each edge weight from the network and the black dots indicate the value of each edge weight by bootstrap procedure, both ordered from the highest to the lowest value. The gray area represents the 95% Confidence Intervals of edge weights, estimated with the non-parametric bootstrap procedure. Wide intervals indicate lower stability and narrow intervals indicate higher stability.

|  |
| --- |
|  |
|  |

Figure S5. Network comparisons of loneliness symptoms by sex, age-group, and epicenter/non-epicenter-residence in Chinese residents. Edge thickness indicates the strength of the association, while green and red edges represent positive and negative associations. Light blue and golden yellow nodes represent social and emotional loneliness communities, respectively.
